# Supplementary material for: A novel variation in RSPO4 causing nonsyndromic congenital nail disorder-4 in a Chinese patient
Source: Front Pediatr. 2025 Jun 20;13:1592954. doi: 10.3389/fped.2025.1592954 (PMC12226482; doi:10.3389/fped.2025.1592954)
Supplement: Supplementary file 1 [file Table1.xls]

## Sheet: Sheet1
Supplementary Table 1：Nail disorder, nonsyndromic congenital (from https://www.omim.org/ )
NUMBER	1	2	3	4	5	6	7	8	9
PHENOTYPE OMIM NUMBER	# 151600	# 607523	# 161050	% 605779	% 614149	# 206800	% 107000	% 149300	% 164800
TITLE	NAIL DISORDER, NONSYNDROMIC CONGENITAL, 3; NDNC3	NAIL DISORDER, NONSYNDROMIC CONGENITAL, 8; NDNC8	NAIL DISORDER, NONSYNDROMIC CONGENITAL, 1; NDNC1	NAIL DISORDER, NONSYNDROMIC CONGENITAL, 7; NDNC7	NAIL DISORDER, NONSYNDROMIC CONGENITAL, 9; NDNC9	NAIL DISORDER, NONSYNDROMIC CONGENITAL, 4; NDNC4	NAIL DISORDER, NONSYNDROMIC CONGENITAL, 6; NDNC6	NAIL DISORDER, NONSYNDROMIC CONGENITAL, 2; NDNC2	NAIL DISORDER, NONSYNDROMIC CONGENITAL, 5; NDNC5
GENE	PLCD1 - 602142	COL7A1 - 120120	FZD6 - 603409			RSPO4 - 610573
INHERITANCE (in 9/9)	- Autosomal dominant	- Autosomal dominant	- Autosomal recessive	- Autosomal dominant	- Autosomal recessive	- Autosomal recessive	- Autosomal dominant	- Autosomal dominant	- Autosomal dominant
	- Autosomal recessive
SKELETAL (in 1/9) ▼							Limbs
							- Patellae present bilaterally
							Hands
							- Tapered distal phalanges (in some patients)
							- Spatulated distal phalanges (in some patients)
							Feet
							- Tapered distal phalanges (in some patients)
							- Spatulated distal phalanges (in some patients)
SKIN, NAILS, & HAIR (in 9/9) ▼									Skin
									- Palmoplantar hyperhidrosis (in some patients)
									- Fissures of soles (in some patients)
									- Sensitivity to cold with paresthesias
	Nails	Nails	Nails	Nails	Nails	Nails	Nails	Nails	Nails
	- Leukonychia totalis	- Toenail dystrophy, most severe in nails of great toes	- Onychauxis (thick nails)	- Longitudinal angular ridges	- Onycholysis of fingernails	- Complete absence of all fingernails (anonychia), congenital	- Onychodystrophy	- Spoon-shaped fingernails (koilonychia), thumb, index, and middle fingers most severely affected	- Onycholysis of distal nails
	- Leukonychia partialis	- Nail plate buried in nail bed	- Onycholysis (detachment of nail from the nail bed)	- Reddish dome-shaped prominence at origin of ridges (in some nails)	- Dystrophy of free margin of fingernails	- Complete absence of all toenails	- Complete anonychia of first digits of hands and feet	- Spoon-shaped toenails	- Discoloration of distal nails
	- Leukonychia striata	- Distal free edge of toenail is deformed and narrow	- Hyponychia	- Thinning of nail plate	- Anonychia of toenails		- Absent or hypoplastic nails of second through fifth digits		- Slowing of nail growth
	- Leukonychia punctata		- Cracked nails	- Free margin notched or split					- Scleronychia (induration and thickening of nails)
			- Discolored nails (at birth)	- Lunulae poorly developed or absent					- Increased transverse curvature in some nails
			- Hyperplastic nails (at birth)	- Platonychia (in some nails)					- Absent lunulae, except on thumbs
			- Slow nail growth	- Koilonychia (in some nails)
			- Claw-like appearance of fingernails
			- Opalescent, dull nails (in adulthood)
MISCELLANEOUS (in 8/9) ▼	- Variable number of nails involved		- Present at birth or onset in early childhood	- Most patients have involvement of all nails, with more severe changes in the nails of the thumbs and great toes	- Nails appear normal at birth, with dystrophic changes developing within the first decade of life	- Patients have no abnormalities of hair, teeth, or bone	- Intrafamilial variability in nail changes	- Intrafamilial variability in degree of nail involvement	- Nail changes may be intermittent in some patients
	- Nails may be intermittently involved		- Slowly progressive					- Sparing of some nails in some individuals
			- Sparing of some nails (in some patients)					- No abnormalities of hair, teeth, or bones
			- No abnormalities of skin, hair, teeth, or bones
MOLECULAR BASIS (in 4/9) ▼	- Caused by mutation in the delta-1 phospholipase C gene (PLCD1, 602142.0001)	- Caused by mutation in the alpha-1 type VII collagen gene (COL7A1, 120120.0014)	- Caused by mutation in the homolog of Drosophila frizzled-6 gene (FZD6, 603409.0001)			- Caused by mutation in the R-spondin 4 gene (RSPO4, 610573.0001)
